# Supplementary material for: Design of Single‐Molecule Multiferroics for Efficient Ultrahigh‐Density Nonvolatile Memories
Source: PubMed Central journal article supplement (PMC6325569; doi:10.1002/advs.201801572), 2018-11-08
Supplement: ADVS-6-1801572-s001.pdf [file ADVS-6-1801572-s001.pdf]

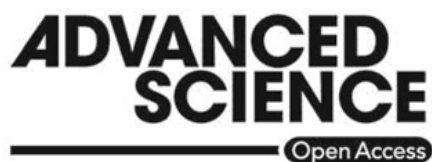

## Supporting Information

for *Adv. Sci.*, DOI: 10.1002/advs.201801572

Design of Single-Molecule Multiferroics for Efficient  
Ultrahigh-Density Nonvolatile Memories

*Qing Yang, Tingting Zhong, Zhengyuan Tu, Lin Zhu, Menghao  
Wu,\* and Xiao Cheng Zeng\**

## Supporting Information

### Design of Single-Molecule Multiferroics for Efficient Ultrahigh-Density Non-Volatile Memories

Qing Yang, Tingting Zhong, Zhengyuan Tu, Lin Zhu, Menghao Wu\*, Xiao Cheng Zeng\*

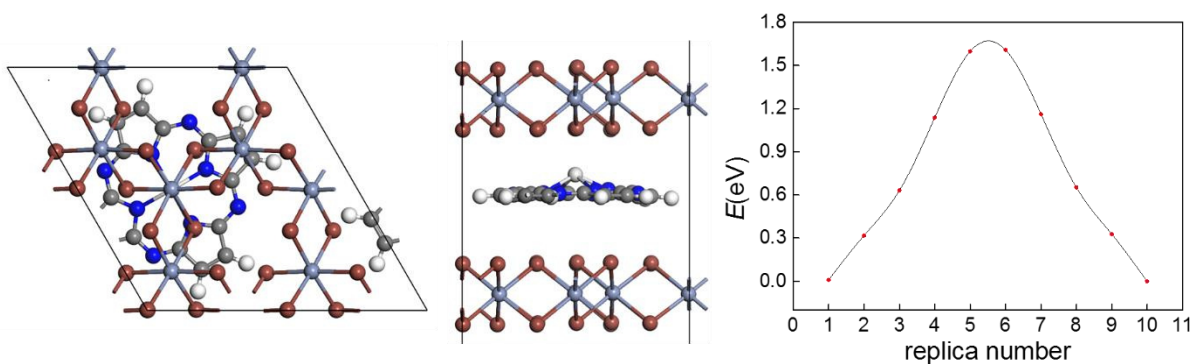

Figure S1. Geometric structures of ScP-intercalated bilayer CrI<sub>3</sub> and its FE switching pathway.
